# Supplementary material for: Variability of Silver Fir Needle (Abies alba Mill.) Anatomical Features in the Southeast Europe Natural Populations
Source: MDPI journal article supplement (doi:10.3390/plants13101307), 2024-05-09
Supplement: s1 [file s1]

**Table S1.** Geographical information for sixteen *Abies alba* Mill. natural populations from Balkan: latitude, longitude, elevation and climatic parameters MAT - mean annual temperature. MAP - annual sum of precipitation, DD > 5 – degree-days above 5 °C (growing degree-days), DD < 18 – degree-days below 18 °C (heating degree-days), Eref - Hargreaves reference evaporation.

| Population    | Latitude<br>WGS84 | Longitude<br>WGS84 | Elevation(m) | MAT | MAP  | DD>5 | DD<18 | Eref |
|---------------|-------------------|--------------------|--------------|-----|------|------|-------|------|
| Pohorje       | 46.6039           | 15.3614            | 720          | 6.6 | 1251 | 1623 | 40    | 655  |
| Goč           | 43.5603           | 20.7086            | 900          | 7.7 | 855  | 1801 | 70    | 688  |
| Lisina        | 44.4038           | 17.0027            | 980          | 6.9 | 1076 | 1610 | 38    | 659  |
| Tara          | 43.9094           | 19.4131            | 1100         | 6.8 | 977  | 1561 | 22    | 635  |
| Pirin         | 41.5689           | 23.5583            | 1100         | 8.3 | 588  | 1903 | 102   | 753  |
| Stara planina | 43.2494           | 22.8380            | 1160         | 6.1 | 712  | 1449 | 10    | 648  |
| Javor         | 43.4147           | 20.0647            | 1200         | 6.5 | 1004 | 1501 | 15    | 621  |
| Kovač         | 43.5033           | 19.1667            | 1250         | 6.3 | 1089 | 1420 | 1     | 634  |
| Osogovo       | 42.2144           | 22.4825            | 1260         | 6.7 | 601  | 1529 | 20    | 698  |
| Zlatar        | 43.4267           | 19.7983            | 1290         | 6.0 | 1032 | 1392 | 0     | 613  |
| Dubočica      | 43.1628           | 19.8775            | 1310         | 6.1 | 1081 | 1399 | 0     | 619  |
| Kopaonik      | 43.2841           | 20.8522            | 1360         | 5.5 | 942  | 1286 | 0     | 595  |
| Romanija      | 43.9297           | 18.4964            | 1380         | 5.3 | 1050 | 1237 | 0     | 605  |
| Golija        | 43.3480           | 20.4472            | 1390         | 5.3 | 971  | 1266 | 0     | 595  |
| Hajla         | 42.7806           | 20.1886            | 1520         | 5.1 | 1102 | 1193 | 0     | 587  |
| Rila          | 42.1517           | 23.5597            | 1860         | 2.9 | 757  | 774  | 0     | 533  |

**Table S2.** Descriptive statistic for silver fir needle anatomical traits: central bundle diameter (CBD), resin duct diameter (RDD), the distance between central bundle and resin duct (DBDRD), hypodermis height (HH), and epidermis thickness with cuticle (ETC) in 16 natural populations.

| Population    | CBD    |              |           |                    |            | RDD    |              |           |                    |            |
|---------------|--------|--------------|-----------|--------------------|------------|--------|--------------|-----------|--------------------|------------|
|               | Mean   | Varianc<br>e | Stde<br>v | Quartil<br>e range | CV(%)<br>) | Mean   | Varianc<br>e | Stde<br>v | Quartil<br>e range | CV(%)<br>) |
| Pohorije      | 295.34 | 1052.03      | 32.43     | 46.82              | 10.98      | 81.53  | 223.33       | 14.94     | 21.55              | 18.33      |
| Goč           | 196.40 | 535.22       | 23.13     | 32.16              | 11.78      | 63.87  | 230.75       | 15.19     | 18.84              | 23.78      |
| Lisina        | 289.02 | 862.11       | 29.36     | 40.61              | 10.16      | 89.50  | 317.80       | 17.83     | 22.89              | 19.92      |
| Tara          | 347.07 | 1574.32      | 39.68     | 48.66              | 11.43      | 112.99 | 474.14       | 21.77     | 29.35              | 19.27      |
| Pirin         | 263.38 | 5756.61      | 75.87     | 45.48              | 28.81      | 91.84  | 387.48       | 19.68     | 26.11              | 21.43      |
| Stara planina | 199.16 | 542.12       | 23.28     | 32.51              | 11.69      | 61.86  | 252.37       | 15.89     | 19.61              | 25.68      |
| Javor         | 213.93 | 900.09       | 30.00     | 47.52              | 14.02      | 66.87  | 257.75       | 16.05     | 22.19              | 24.01      |
| Kovač         | 314.26 | 2198.85      | 46.89     | 67.79              | 14.92      | 99.70  | 623.65       | 24.97     | 37.95              | 25.05      |
| Osogovo       | 319.53 | 2147.67      | 46.34     | 66.00              | 14.50      | 94.90  | 543.72       | 23.32     | 35.14              | 24.57      |
| Zlatar        | 200.32 | 687.73       | 26.22     | 36.77              | 13.09      | 66.27  | 297.52       | 17.25     | 23.26              | 26.03      |
| Dubočica      | 196.59 | 621.90       | 24.94     | 32.14              | 12.69      | 69.19  | 421.04       | 20.52     | 28.20              | 29.65      |
| Kopaonik      | 306.25 | 1694.39      | 41.16     | 48.70              | 13.44      | 117.19 | 552.16       | 23.50     | 26.44              | 20.05      |
| Romanija      | 301.75 | 963.40       | 31.04     | 41.07              | 10.29      | 98.33  | 294.75       | 17.17     | 21.69              | 17.46      |
| Golija        | 220.41 | 657.94       | 25.65     | 39.89              | 11.64      | 64.95  | 278.97       | 16.70     | 22.61              | 25.72      |
| Hajla         | 306.35 | 2741.90      | 52.36     | 69.13              | 17.09      | 117.60 | 549.50       | 23.44     | 26.75              | 19.93      |
| Rila          | 246.64 | 1418.75      | 37.67     | 52.90              | 15.27      | 88.26  | 408.57       | 20.21     | 22.09              | 22.90      |

Table S2. Continued.

| Population    | DBDRD  |          |       |                |       | HH    |          |       |                |       |
|---------------|--------|----------|-------|----------------|-------|-------|----------|-------|----------------|-------|
|               | Mean   | Variance | Stdev | Quartile range | CV(%) | Mean  | Variance | Stdev | Quartile range | CV(%) |
| Pohorije      | 521.92 | 7386.86  | 85.95 | 115.22         | 16.47 | 19.88 | 13.70    | 3.70  | 4.76           | 18.62 |
| Goč           | 439.37 | 3211.32  | 56.67 | 87.50          | 12.90 | 19.36 | 15.92    | 3.99  | 5.09           | 20.61 |
| Lisina        | 596.79 | 2443.08  | 49.43 | 62.22          | 8.28  | 21.93 | 19.22    | 4.38  | 5.45           | 19.99 |
| Tara          | 552.43 | 6917.14  | 83.17 | 100.76         | 15.06 | 19.85 | 15.87    | 3.98  | 4.52           | 20.07 |
| Pirin         | 551.36 | 5317.46  | 72.92 | 94.71          | 13.23 | 20.57 | 17.55    | 4.19  | 5.49           | 20.37 |
| Stara planina | 453.82 | 2184.60  | 46.74 | 63.49          | 10.30 | 18.65 | 14.02    | 3.74  | 4.82           | 20.08 |
| Javor         | 396.48 | 3129.47  | 55.94 | 73.03          | 14.11 | 19.89 | 17.07    | 4.13  | 5.28           | 20.77 |
| Kovač         | 527.59 | 5164.05  | 71.86 | 103.81         | 13.62 | 20.49 | 16.56    | 4.07  | 5.60           | 19.87 |
| Osogovo       | 591.21 | 9173.23  | 95.78 | 144.79         | 16.20 | 22.68 | 18.00    | 4.24  | 5.16           | 18.71 |
| Zlatar        | 433.55 | 3512.62  | 59.27 | 80.87          | 13.67 | 18.74 | 12.56    | 3.54  | 4.39           | 18.91 |
| Dubočica      | 416.27 | 4765.43  | 69.03 | 95.07          | 16.58 | 19.51 | 17.05    | 4.13  | 5.09           | 21.17 |
| Kopaonik      | 578.26 | 7086.32  | 84.18 | 95.60          | 14.56 | 19.26 | 16.54    | 4.07  | 5.00           | 21.12 |
| Romanija      | 603.53 | 7241.49  | 85.10 | 112.51         | 14.10 | 20.86 | 17.91    | 4.23  | 5.20           | 20.29 |
| Golija        | 440.11 | 4200.07  | 64.81 | 99.30          | 14.73 | 18.92 | 11.40    | 3.38  | 3.84           | 17.85 |
| Hajla         | 495.43 | 5954.83  | 77.17 | 112.96         | 15.58 | 18.76 | 21.17    | 4.60  | 5.84           | 24.53 |
| Rila          | 550.04 | 6104.15  | 78.13 | 118.43         | 14.20 | 21.85 | 17.59    | 4.19  | 4.96           | 19.19 |

**Table S2.** Continued.

| Population    | ETC   |          |       |                |       |
|---------------|-------|----------|-------|----------------|-------|
|               | Mean  | Variance | Stdev | Quartile range | CV(%) |
| Pohorije      | 12.83 | 8.89     | 2.98  | 3.36           | 23.24 |
| Goč           | 12.18 | 13.83    | 3.72  | 4.23           | 30.54 |
| Lisina        | 13.09 | 8.15     | 2.85  | 3.54           | 21.81 |
| Tara          | 22.12 | 16.43    | 4.05  | 5.35           | 18.32 |
| Pirin         | 13.20 | 10.32    | 3.21  | 4.21           | 24.34 |
| Stara planina | 11.11 | 7.21     | 2.69  | 3.44           | 24.17 |
| Javor         | 12.46 | 10.68    | 3.27  | 4.07           | 26.23 |
| Kovač         | 13.29 | 9.50     | 3.08  | 4.02           | 23.19 |
| Osogovo       | 14.76 | 11.00    | 3.32  | 3.87           | 22.46 |
| Zlatar        | 10.70 | 7.03     | 2.65  | 3.67           | 24.78 |
| Dubočica      | 10.59 | 7.89     | 2.81  | 3.38           | 26.53 |
| Kopaonik      | 22.20 | 23.45    | 4.84  | 6.04           | 21.82 |
| Romanija      | 12.59 | 7.86     | 2.80  | 3.69           | 22.28 |
| Golija        | 11.10 | 4.99     | 2.23  | 2.84           | 20.14 |
| Hajla         | 13.53 | 11.59    | 3.40  | 4.44           | 25.15 |
| Rila          | 14.11 | 10.29    | 3.21  | 4.43           | 22.74 |

**Table S3.** Results of linear regression analysis with climatic factors as explanatory variable and anatomical trait response variable.

| Trait |           | Regressions coefficients |        |         |          | Regression statistics |                    |         |                   |
|-------|-----------|--------------------------|--------|---------|----------|-----------------------|--------------------|---------|-------------------|
|       |           | Coefficients             | SE     | t-value | <i>p</i> | R <sup>2</sup>        | Adj R <sup>2</sup> | F value | <i>p</i>          |
| CBD   | Intercept | 270.24                   | 5.63   | 48.01   | <0.0001  | 0.0005                | 0.0002             | 1.4     | 0.2236            |
|       | Altitude  | -0.005                   | 0.004  | -1.22   | 0.2236   |                       |                    |         |                   |
| RDD   | Intercept | 65.16                    | 2.36   | 27.59   | <0.0001  | 0.0260                | 0.0257             | 85.47   | <b>&lt;0.0001</b> |
|       | Altitude  | 0.017                    | 0.009  | 9.25    | <0.0001  |                       |                    |         |                   |
| DBDRD | Intercept | 490.65                   | 8.72   | 56.26   | <0.0001  | 0.0015                | 0.0012             | 4.75    | 0.0295            |
|       | Altitude  | 0.015                    | 0.007  | 2.18    | 0.0295   |                       |                    |         |                   |
| HH    | Intercept | 19.51                    | 0.37   | 52.65   | <0.0001  | 0.0007                | 0.0004             | 2.39    | 0.1220            |
|       | Altitude  | 0.0004                   | 0.0003 | 1.55    | 0.1220   |                       |                    |         |                   |
| ETC   | Intercept | 13.01                    | 0.412  | 31.54   | <0.0001  | 0.0010                | 0.007              | 3.26    | 0.0712            |
|       | Altitude  | 0.0006                   | 0.0003 | 1.80    | 0.0712   |                       |                    |         |                   |

| Trait |           | Regressions coefficients |      |         |          | Regression statistics |                    |         |                   |
|-------|-----------|--------------------------|------|---------|----------|-----------------------|--------------------|---------|-------------------|
|       |           | Coefficients             | SE   | t-value | <i>p</i> | R <sup>2</sup>        | Adj R <sup>2</sup> | F value | <i>p</i>          |
| CBD   | Intercept | 261.65                   | 5.99 | 43.67   | <0.0001  | 0.0000                | -0.0003            | 0.10    | 0.7499            |
|       | MAT       | 0.31                     | 0.96 | 0.32    | 0.7499   |                       |                    |         |                   |
| RDD   | Intercept | 100.78                   | 2.53 | 39.77   | <0.0001  | 0.0101                | 0.0098             | 32.70   | <b>&lt;0.0001</b> |
|       | MAT       | -2.32                    | 0.40 | -5.72   |          |                       |                    |         |                   |
| DBDRD | Intercept | 530.09                   | 9.28 | 57.12   | <0.001   | 0.0016                | 0.0013             | 5.23    | 0.0223            |
|       | MAT       | -3.40                    | 1.49 | -2.29   | 0.0223   |                       |                    |         |                   |
| HH    | Intercept | 20.27                    | 0.39 | 51.38   | <0.0001  | 0.0001                | -0.0002            | 0.26    | 0.6121            |
|       | MAT       | -0.032                   | 0.06 | -0.51   | 0.6121   |                       |                    |         |                   |
| ETC   | Intercept | 14.15                    | 0.43 | 32.22   | <0.0001  | 0.0003                | -0.0000            | 0.90    | 0.3427            |

| MAT   |           | -0.07                    | 0.07   | -0.95   | 0.3427   |                       |                    |         |                   |
|-------|-----------|--------------------------|--------|---------|----------|-----------------------|--------------------|---------|-------------------|
|       |           | Regressions coefficients |        |         |          | Regression statistics |                    |         |                   |
| Trait |           | Coefficients             | SE     | t-value | <i>p</i> | R <sup>2</sup>        | Adj R <sup>2</sup> | F value | <i>p</i>          |
| CBD   | Intercept | 228.71                   | 5.87   | 38.96   | <0.0001  | 0.0113                | 0.0110             | 36.53   | <b>&lt;0.0001</b> |
|       | MAP       | 0.04                     | 0.006  | 6.04    | <0.0001  |                       |                    |         |                   |
| RDD   | Intercept | 78.77                    | 2.51   | 31.4    | <0.0001  | 0.0031                | 0.0028             | 10.03   | <b>0.0016</b>     |
|       | MAP       | 0.008                    | 0.003  | 3.17    | 0.0016   |                       |                    |         |                   |
| DBDRD | Intercept | 565.79                   | 9.10   | 62.21   | <0.0001  | 0.0124                | 0.0121             | 40.11   | <b>&lt;0.0001</b> |
|       | MAP       | 0.06                     | 0.01   | -6.33   | <0.0001  |                       |                    |         |                   |
| HH    | Intercept | 23.04                    | 0.39   | 59.93   | <0.0001  | 0.0083                | 0.0080             | 26.73   | <b>&lt;0.0001</b> |
|       | MAP       | -0.002                   | 0.0004 | -5.17   | <0.0001  |                       |                    |         |                   |
| ETC   | Intercept | 17.88                    | 0.4322 | 34.42   | <0.0001  | 0.002                 | 0.0019             | 7.17    | <b>0.0074</b>     |
|       | MAP       | -0.0012                  | 0.0005 | -2.68   | 0.0074   |                       |                    |         |                   |

**Table S3.** Continued.

|       |           | Regressions coefficients |        |         |          | Regression statistics |                    |         |                   |
|-------|-----------|--------------------------|--------|---------|----------|-----------------------|--------------------|---------|-------------------|
| Trait |           | Coefficients             | SE     | t-value | <i>p</i> | R <sup>2</sup>        | Adj R <sup>2</sup> | F value | <i>p</i>          |
| CBD   | Intercept | 269.14                   | 6.47   | 41.61   | <0.0001  | 0.0002                | -0.0001            | 0.78    | 0.3784            |
|       | DD>5      | -0.004                   | 0.004  | -0.88   | 0.3784   |                       |                    |         |                   |
| RDD   | Intercept | 106.43                   | 2.73   | 39.04   | <0.0001  | 0.0169                | 0.0165             | 54.82   | <b>&lt;0.0001</b> |
|       | DD>5      | -0.014                   | 0.0019 | -7.40   | <0.0001  |                       |                    |         |                   |
| DBDRD | Intercept | 533.86                   | 10.01  | 53.29   | <0.0001  | 0.0019                | 0.0016             | 6.22    | <b>&lt;0.0127</b> |
|       | DD>5      | -0.017                   | 0.007  | -2.49   | 0.0127   |                       |                    |         |                   |
| HH    | Intercept | 20.33                    | 0.43   | 47.72   | <0.0001  | 0.0001                | -0.0002            | 0.36    | 0.5490            |
|       | DD>5      | -0.0002                  | 0.0003 | -0.60   | 0.5490   |                       |                    |         |                   |
| ETC   | Intercept | 14.58                    | 0.47   | 30.76   | <0.0001  | 0.0010                | 0.0007             | 3.21    | 0.0734            |
|       | DD>5      | -0.0006                  | 0.0003 | -1.79   | 0.0734   |                       |                    |         |                   |

|       |           | Regressions coefficients |        |         |          | Regression statistics |                    |         |                   |
|-------|-----------|--------------------------|--------|---------|----------|-----------------------|--------------------|---------|-------------------|
| Trait |           | Coefficients             | SE     | t-value | <i>p</i> | R <sup>2</sup>        | Adj R <sup>2</sup> | F value | <i>p</i>          |
| CBD   | Intercept | 263.87                   | 11.81  | 22.35   | <0.0001  | 0.0000                | -0.0003            | 0.00    | 0.9767            |
|       | DD>18     | -0.0001                  | 0.003  | -0.03   | 0.9767   |                       |                    |         |                   |
| RDD   | Intercept | 57.03                    | 4.99   | 11.43   | <0.0001  | 0.0109                | 0.0106             | 35.32   | <b>&lt;0.0001</b> |
|       | DD>18     | 0.007                    | 0.001  | 5.94    | <0.0001  |                       |                    |         |                   |
| DBDRD | Intercept | 464.59                   | 1.28   | 25.41   | <0.0001  | 0.0019                | 0.0016             | 6.02    | <b>0.0142</b>     |
|       | DD>18     | 0.01                     | 0.004  | 2.45    | 0.0142   |                       |                    |         |                   |
| HH    | Intercept | 19.64                    | 0.78   | 25.26   | <0.0001  | 0.0001                | -0.0002            | 0.32    | 0.5728            |
|       | DD>18     | 0.00001                  | 0.0001 | 0.56    | 0.5728   |                       |                    |         |                   |
| ETC   | Intercept | 12.73                    | 0.86   | 17.72   | <0.0001  | 0.0004                | 0.0001             | 1.37    | 0.2413            |
|       | DD>18     | 0.0003                   | 0.0001 | 1.17    | 0.2413   |                       |                    |         |                   |

|  |  | Regressions coefficients |  |  |  | Regression statistics |  |  |  |
|--|--|--------------------------|--|--|--|-----------------------|--|--|--|
|--|--|--------------------------|--|--|--|-----------------------|--|--|--|

| Trait |           | Coefficients | SE      | t-value | <i>p</i> | R <sup>2</sup> | Adj R <sup>2</sup> | F value | <i>p</i>          |
|-------|-----------|--------------|---------|---------|----------|----------------|--------------------|---------|-------------------|
| CBD   | Intercept | 231.39       | 14.44   | 16.02   | <0.0001  | 0.0016         | 0.0012             | 4.98    | <b>0.0257</b>     |
|       | Eref      | 0.05         | 0.23    | 2.23    | 0.0257   |                |                    |         |                   |
| RDD   | Intercept | 115.32       | 6.12    | 18.84   | <0.0001  | 0.0069         | 0.0066             | 22.21   | <b>&lt;0.0001</b> |
|       | Eref      | -0.05        | 0.010   | -4.71   | <0.0001  |                |                    |         |                   |
| DBDRD | Intercept | 405.85       | 22.33   | 18.18   | <0.0001  | 0.0067         | 0.0064             | 21.58   | <b>&lt;0.0001</b> |
|       | Eref      | 0.16         | 0.04    | 4.65    | <0.0001  |                |                    |         |                   |
| HH    | Intercept | 17.13        | 0.95    | 18.02   | <0.0001  | 0.0030         | 0.0027             | 9.68    | <b>0.0019</b>     |
|       | Eref      | 0.005        | 0.002   | 3.11    | 0.0019   |                |                    |         |                   |
| ETC   | Intercept | 17.57        | 1.06    | 16.63   | <0.0001  | 0.0041         | 0.0038             | 13.24   | <b>&lt;0.0003</b> |
|       | Eref      | -0.006       | -0.0065 | -3.64   | 0.0003   |                |                    |         |                   |
